# Supplementary material for: The Societal Dimension of e-Government in UK.
Source: PeerJ journal article supplement (doi:10.7717/peerj.14991), 2008-01-01
Supplement: FigS6.pdf [file FigS6.pdf]

**Von Bertalanffy fit**

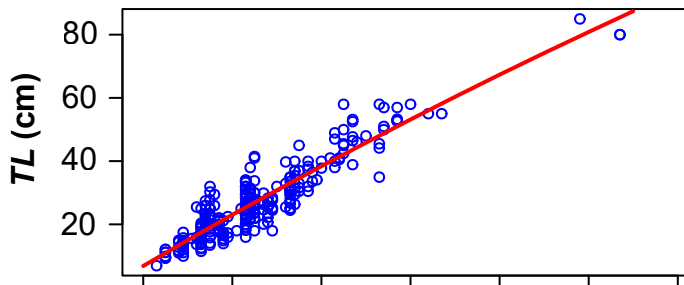

**Von Bertalanffy residuals**

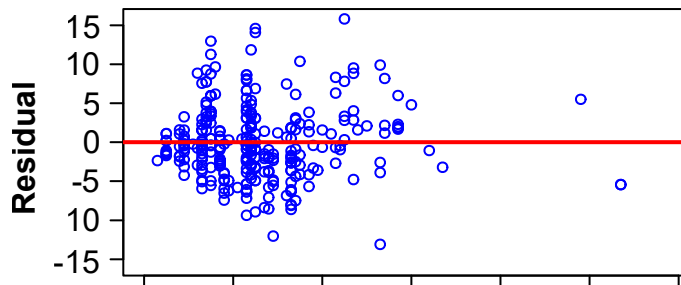

**Gompertz fit**

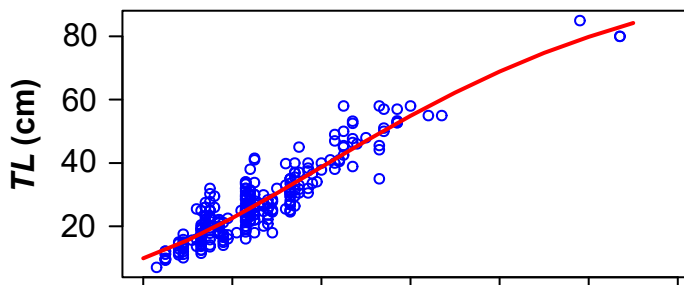

**Gompertz residuals**

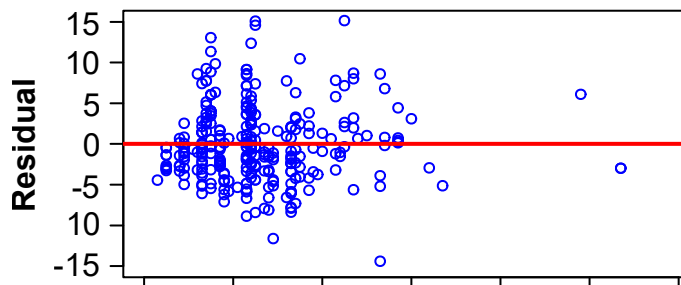

**Logistic fit**

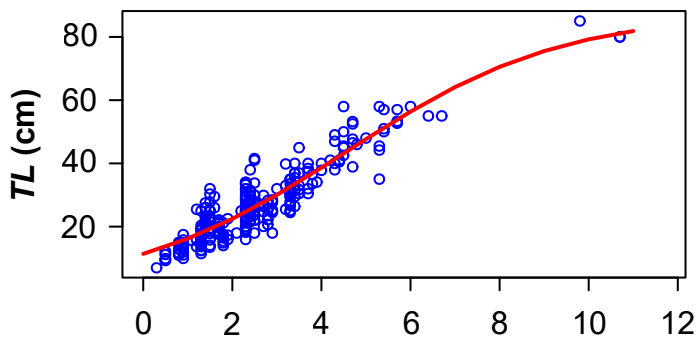

**Logistic residuals**

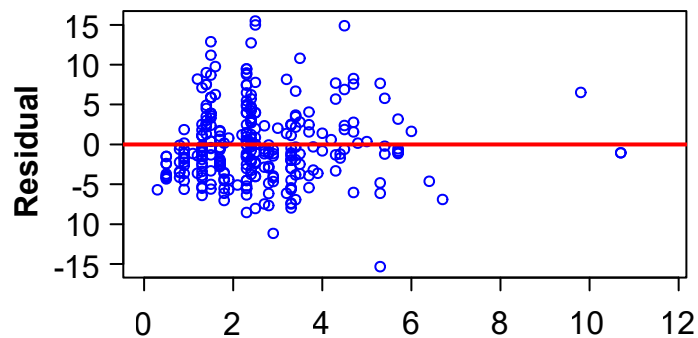

**Age (years)**

**fitted TL (cm)**
