# Supplementary material for: The Societal Dimension of e-Government in UK.
Source: PeerJ journal article supplement (doi:10.7717/peerj.14991), 2008-01-01

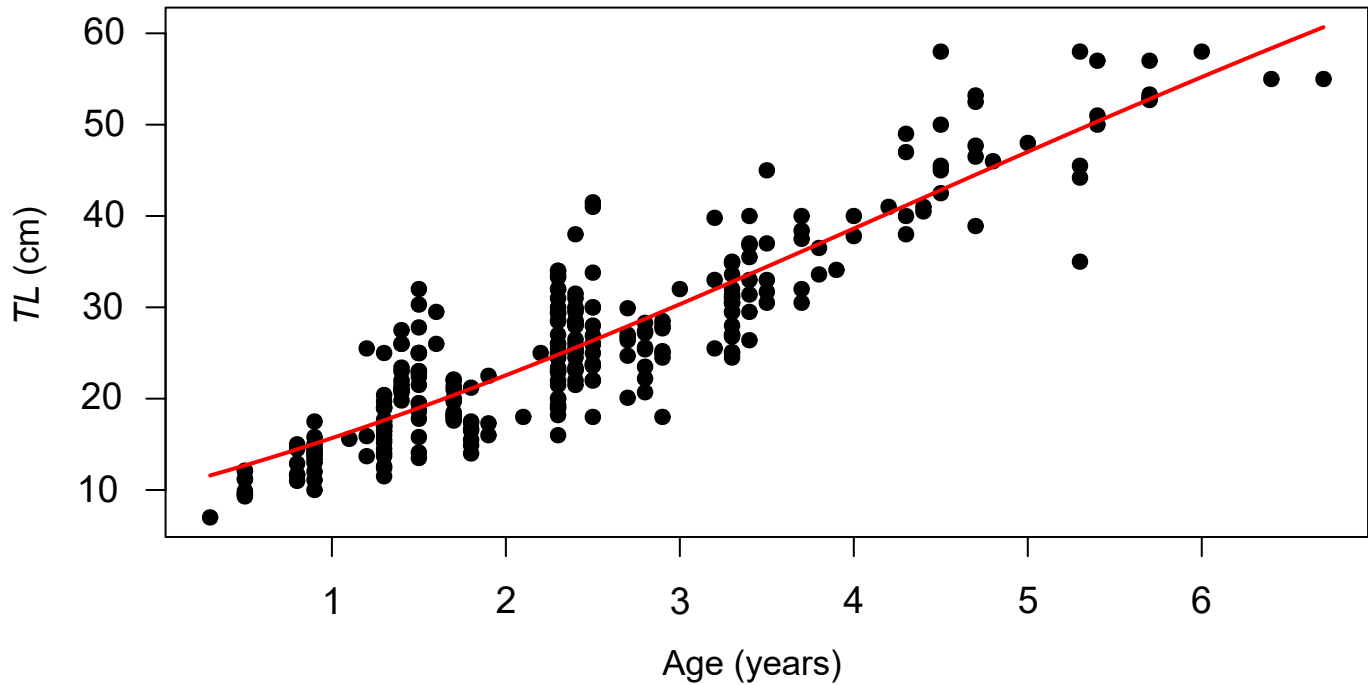

Supplement: FigS7.pdf [file FigS7.pdf]
