# Supplementary material for: The Societal Dimension of e-Government in UK.
Source: PeerJ journal article supplement (doi:10.7717/peerj.14991), 2008-01-01

**a**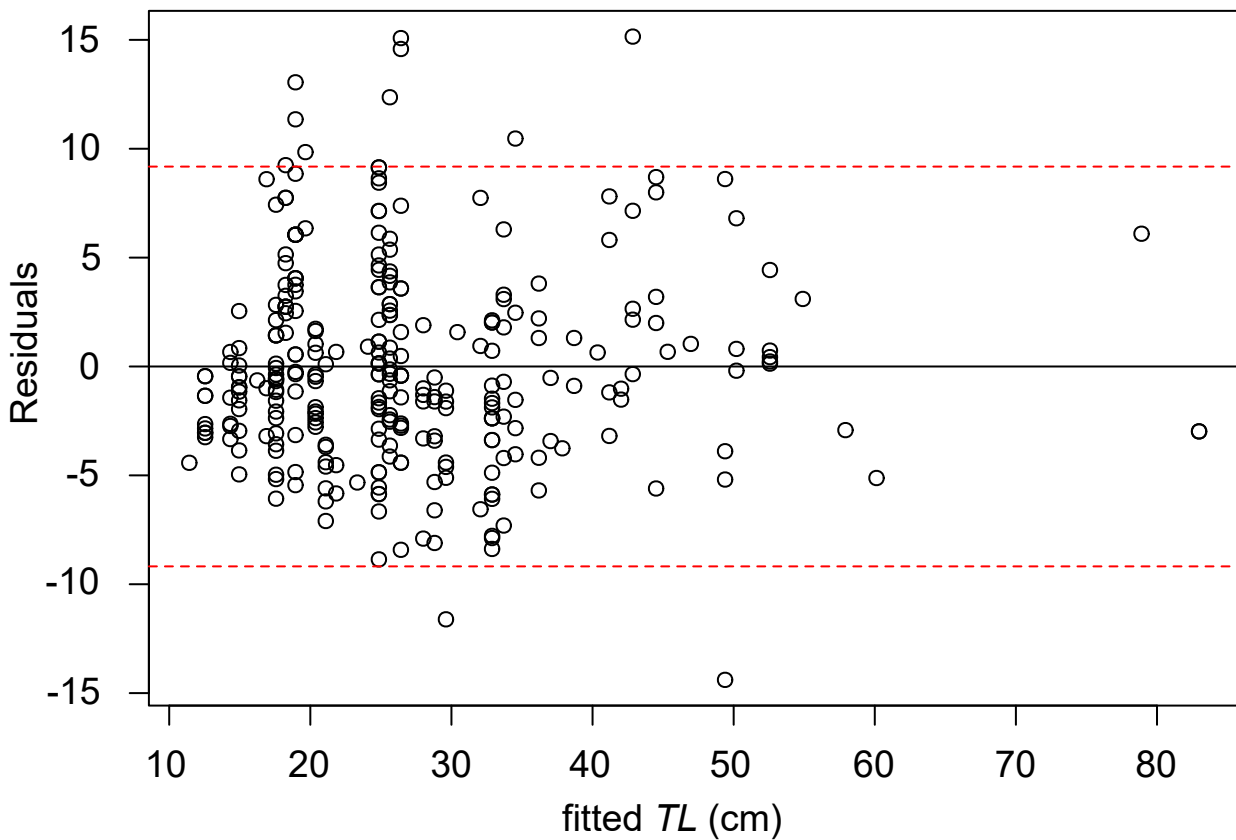**b**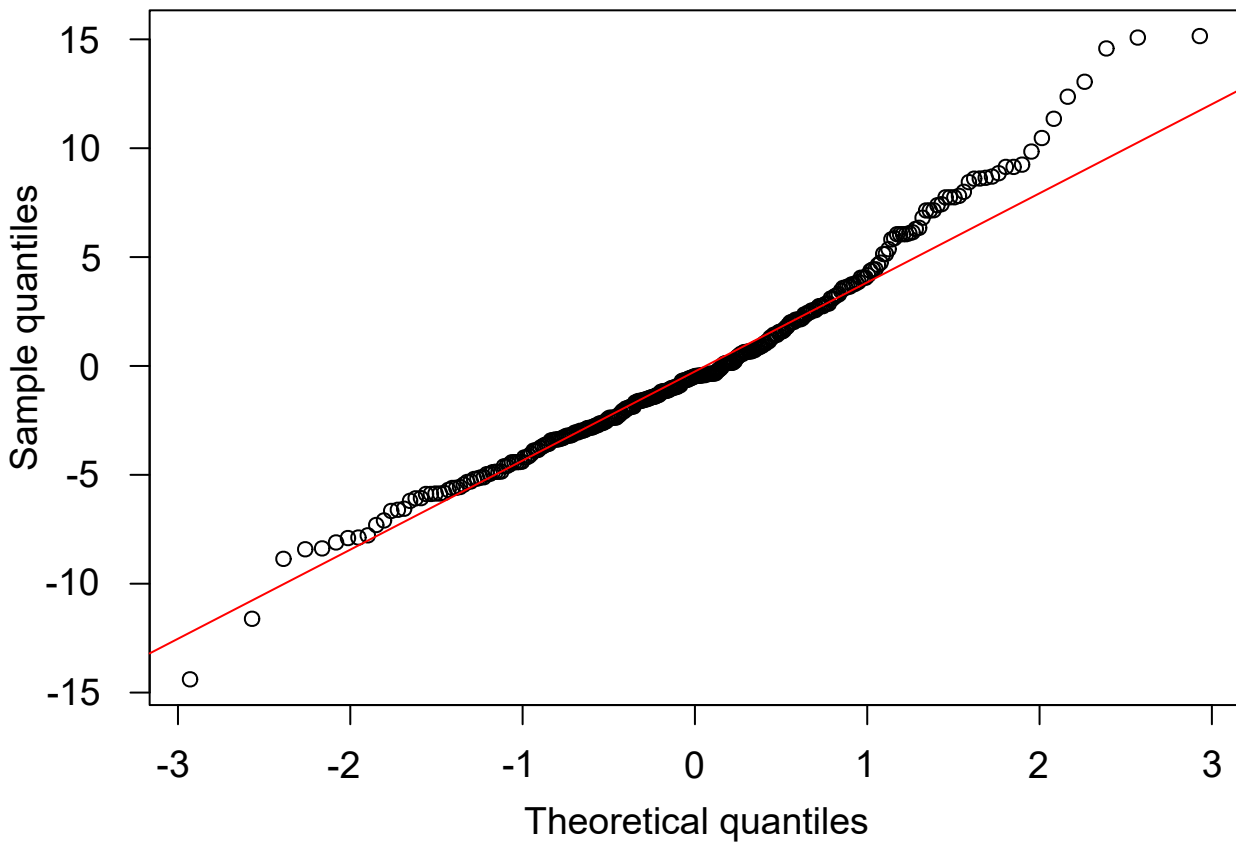

Supplement: FigS8.pdf [file FigS8.pdf]
